# Supplementary material
Source: PubMed Central journal article supplement (PMC10192128)
Supplement: NIHMS1894910-supplement-1.pdf [file NIHMS1894910-supplement-1.pdf]

**Supplemental Table 1: Placental lesions across gestational age ranges, identified by Pinar et al. (2014) [5]**

|                                              | <b>Developmental</b>                                         | <b>Inflammatory</b>                                                                                                                                                | <b>Circulatory</b>                                                                                                 |
|----------------------------------------------|--------------------------------------------------------------|--------------------------------------------------------------------------------------------------------------------------------------------------------------------|--------------------------------------------------------------------------------------------------------------------|
| <b>&lt;24 week stillbirth</b>                | Velamentous umbilical cord insertion                         | Acute chorioamnionitis, funisitis, umbilical cord phlebitis, chorionic plate vasculitis                                                                            | Diffuse avascular villi                                                                                            |
| <b>24 – 31<sup>6/7</sup> week stillbirth</b> | Single umbilical artery                                      | Acute chorioamnionitis (chorionic plate), funisitis, umbilical cord arteritis, umbilical cord phlebitis, chorionic plate vasculitis, vascular degenerative changes | Retroplacental hematoma, diffuse infarction, avascular villi (focal/diffuse)                                       |
| <b>32 – 36<sup>6/7</sup> week stillbirth</b> | Single umbilical artery                                      | Chorionic plate vascular degenerative changes                                                                                                                      | Retroplacental hematoma, focal/diffuse infarction, perivillous fibrin deposition, chorionic fetal vascular thrombi |
| <b>≥37 week stillbirth</b>                   | Single umbilical artery, diffuse terminal villous immaturity | Acute chorioamnionitis, chorionic plate vascular degenerative changes                                                                                              | Intraparenchymal thrombus, chorionic fetal vascular thrombi, avascular villi, edema (placental hydrops)            |

**Supplemental Table 2: Lesions included in Kernel Principal Covariates Regression, with definitions according to Pinar et al. (2011) [12]**

| <b>Category</b>      | <b>Lesion</b>                               | <b>Definition</b>                                                                                                                                                                                                   |
|----------------------|---------------------------------------------|---------------------------------------------------------------------------------------------------------------------------------------------------------------------------------------------------------------------|
| <b>Developmental</b> | Abnormal cord insertion                     | Velamentous (within placental membranes) or furcate (without Wharton's substance)                                                                                                                                   |
|                      | Single umbilical artery                     | Absence of one umbilical artery                                                                                                                                                                                     |
|                      | Terminal villous immaturity                 | Increased terminal villous diameter, increased stromal fibroblasts and macrophages, centralized capillaries, lack of vasculosyncytial membranes                                                                     |
|                      | Terminal villous hypoplasia                 | Decrease in the number and modal diameter of distal villi at the center of the lobule after adjustment for plane of section and gestational age                                                                     |
|                      | Abnormal membrane insertion                 | Circummarginate (parenchyma continues beyond insertion of the membranes leaving uncovered placental tissue) or circumvallate (membranes are folded over at the margin, decreasing the surface area of the placenta) |
| <b>Inflammatory</b>  | Acute chorioamnionitis                      | Presence of inflammatory cells in placental membranes or chorionic plate                                                                                                                                            |
|                      | Acute funisitis                             | Presence of inflammatory cells in Wharton's substance                                                                                                                                                               |
|                      | Acute umbilical cord phlebitis or arteritis | Presence of inflammatory cells in umbilical vein or artery walls                                                                                                                                                    |
|                      | Chorionic vasculitis                        | Presence of inflammatory cells in chorionic vessels                                                                                                                                                                 |
|                      | Chorionic vascular degeneration             | Homogenization of the muscular wall of chorionic vessels                                                                                                                                                            |
|                      | Intervillitis                               | Presence of inflammatory cells in intervillous space                                                                                                                                                                |
|                      | Acute/chronic villitis                      | Presence of macrophages or other inflammatory cells within villous stroma                                                                                                                                           |
|                      | Deciduitis                                  | Presence of inflammatory cells within the decidua of basal plate or free membranes                                                                                                                                  |
| <b>Circulatory</b>   | Avascular villi                             | Loss of villous capillaries and bland hyalinization of villous stroma                                                                                                                                               |
|                      | Retroplacental hematoma                     | Clots present behind the placenta, with or without strong adherence to basal plate (gross)                                                                                                                          |
|                      | Hemorrhage of placental disc                | Gross or microscopic presence of hemorrhage within villous parenchyma or basal plate                                                                                                                                |
|                      | Parenchymal infarct                         | Fresh (reddish or rusty-brown appearance, firmer in consistency) or older (yellow, firmer, fibrous), with or without involvement of the entire thickness of the placenta (gross)                                    |
|                      | Intravillous thrombus                       | Clotted blood within chorionic villi (microscopic or gross)                                                                                                                                                         |

|                               |                                 |                                                                                                                                                                                                                                                                                                                                                                                                                             |                                                      |
|-------------------------------|---------------------------------|-----------------------------------------------------------------------------------------------------------------------------------------------------------------------------------------------------------------------------------------------------------------------------------------------------------------------------------------------------------------------------------------------------------------------------|------------------------------------------------------|
|                               | Villous fibrin deposition       | Evolved infarcts with fibrin deposition                                                                                                                                                                                                                                                                                                                                                                                     |                                                      |
|                               | Fetal vascular thrombi          | Thrombi present within fetal vessels on placental disc                                                                                                                                                                                                                                                                                                                                                                      |                                                      |
|                               | Fetal vascular disruption       | Occlusion or obstruction of fetal vessels on placental disc (gross)                                                                                                                                                                                                                                                                                                                                                         |                                                      |
|                               | Nucleated fetal red blood cells | The presence of three fields containing at least two unequivocal normoblasts (Nucleated red blood cells – NRBC) in a single terminal villus (capillaries) in one microscopic section examined at 40x magnification                                                                                                                                                                                                          |                                                      |
|                               | Decidual vasculopathy           | Changes that occur in the decidual arterioles in preeclampsia or other hypertensive disorders: (1) thick-walled decidual arterioles (hypertrophic); (2) decidual vessels with acute atherosclerosis and/or fibrinoid necrosis and/or foamy macrophages                                                                                                                                                                      |                                                      |
|                               | Abundant blood clots            | Presence of excessive amount of blood clots attached to the specimen or loose in the container                                                                                                                                                                                                                                                                                                                              |                                                      |
| <b>Placental Disc (other)</b> | Syncytial knots                 | Aggregates of syncytiotrophoblast nuclei along proximal stem villi or at one or more poles of distal villi. A severe increase was defined as excessive knots for gestational age at the periphery of lobule in > 30% of parenchyma. The extent of syncytial knotting was estimated as the percentage of villous parenchyma with more knots than expected for gestational age in the bottom 75% of a full-thickness section. |                                                      |
|                               | Trophoblast proliferation       | Foamy trophoblasts, trophoblastic giant cells, or immature extravillous trophoblast of basal plate                                                                                                                                                                                                                                                                                                                          |                                                      |
|                               | Chorangioma                     | Benign neoplastic proliferation of capillaries and stroma within a villus forming an expansile nodular lesion                                                                                                                                                                                                                                                                                                               |                                                      |
|                               | Chorangiomatosis                | Multifocal lesion characterized by an increase in villous capillaries that tends to permeate the normal villous structures                                                                                                                                                                                                                                                                                                  |                                                      |
|                               | Chorangiosis                    | Diffuse increase in the number of villous capillaries                                                                                                                                                                                                                                                                                                                                                                       |                                                      |
|                               | Villous karyorrhexis            | Karyorrhexis of fetal blood cells, endothelium, and/or stromal cells with preservation of surrounding trophoblast                                                                                                                                                                                                                                                                                                           |                                                      |
|                               | Irregular lobulations           | Irregular pattern of basal plate                                                                                                                                                                                                                                                                                                                                                                                            |                                                      |
|                               | Inclusion bodies                | Viral or other inclusions within the villous parenchyma                                                                                                                                                                                                                                                                                                                                                                     |                                                      |
|                               | <b>Umbilical cord (other)</b>   | True knot                                                                                                                                                                                                                                                                                                                                                                                                                   | Defined as “tight” if they can not be easily reduced |
|                               |                                 | Vascular lesion                                                                                                                                                                                                                                                                                                                                                                                                             | Lesions within the artery or vein of umbilical cord  |
| Punctate/gross hemorrhages    |                                 | Presence of hemorrhage within Wharton’s substance                                                                                                                                                                                                                                                                                                                                                                           |                                                      |
| Degeneration                  |                                 | Homogenization of the muscular wall of umbilical vessels                                                                                                                                                                                                                                                                                                                                                                    |                                                      |

|                                                                       |                     |                                                                                                            |
|-----------------------------------------------------------------------|---------------------|------------------------------------------------------------------------------------------------------------|
| <b>Multifocal findings (chorion, membranes, disc, umbilical cord)</b> | Reactive amniocytes | Amniocytes with vacuolization of cytoplasm, heaping up of cells, dissociation, loss of cells, and necrosis |
|                                                                       | Calcifications      | Nodules or plaques of calcium                                                                              |
|                                                                       | Meconium            | Brown, green, or yellow discoloration                                                                      |
|                                                                       | Amniotic bands      | Amniotic bands creating any degree of disruption in fetus or placenta                                      |
|                                                                       | Edema               | Changes suggestive of acute increase in extracellular fluid, tissue bubbles separated by reticulin fibers  |
|                                                                       | Hemosiderin         | Crystalline yellowish pigment, often larger in size than meconium                                          |
|                                                                       | Amnion nodosum      | Nodular structures on the amnion                                                                           |
|                                                                       | Necrosis            | Necrotic cells/structures present                                                                          |

*Note: some lesions are included as either “focal” or “diffuse”*

Journal Pre-proof
